# Supplementary material
Source: Springer Nature journal article supplement (https://www.springermedizin.de/resource/supplementary/13075_2013_4448_MOESM8_ESM.pdf/10110428)

**A**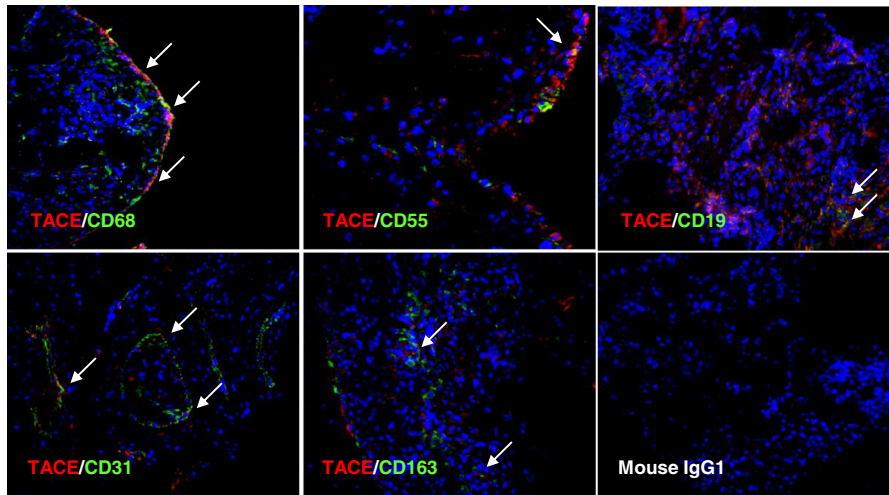**B**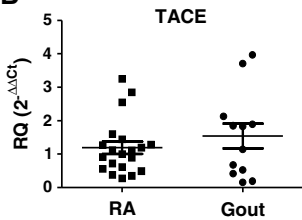

Supplement: MOESM8 [file 10110428]
